# Supplementary material for: Selective role of the DNA helicase Mcm5 in BMP retrograde signaling during Drosophila neuronal differentiation
Source: PLoS Genet. 2022 Jun 23;18(6):e1010255. doi: 10.1371/journal.pgen.1010255 (PMC9258838; doi:10.1371/journal.pgen.1010255)
Supplement: S2 Table — (XLSX) [file pgen.1010255.s005.xlsx]

## Sheet: Fig 1G
Fig 1G
TV4 proFMRFa cells
Control	Mcm5exc222	pros>Mcm5
10	0	10
10	0	10
9	0	10
6	0	6
6	0	6
6	0	6
6	0	5
7	0	6
6	0	6
6	0	6
6	0	6
6	1	6
6	0	7
6	0	6
6	0	6
6	1	6
5	0	6

## Sheet: Fig 1H
Fig 1H
SE2 proFMRFa cells
Control	Mcm5exc222	pros>Mcm5
2	2	2
2	2	2
2	2	2
2	2	2
2	2	2
2	2	2
2	2	2
2	2	2
2	2	2
2	2	2
2	2	2
2	2	2
1.9	1.9	2.1

## Sheet: Fig 3F
Fig 3F
BMP Pathway activation
Genotype	Segment	Hemisegment	FMRFa+
w118	T1	R	1
w118	T1	L	1
w118	T2	R	1
w118	T2	L	1
w118	T3	R	1
w118	T3	L	1
w118	T1	R	1
w118	T1	L	1
w118	T2	R	1
w118	T2	L	1
w118	T3	R	1
w118	T3	L	1
w118	T1	R	0
w118	T1	L	1
w118	T2	R	1
w118	T2	L	1
w118	T3	R	1
w118	T3	L	1
w118	T1	R	1
w118	T1	L	1
w118	T2	R	1
w118	T2	L	1
w118	T3	R	1
w118	T3	L	1
prosGal4,mcm5- (Recombinante 4)	T1	R	0
prosGal4,mcm5- (Recombinante 4)	T1	L	0
prosGal4,mcm5- (Recombinante 4)	T2	R	0
prosGal4,mcm5- (Recombinante 4)	T2	L	0
prosGal4,mcm5- (Recombinante 4)	T3	R	0
prosGal4,mcm5- (Recombinante 4)	T3	L	0
prosGal4,mcm5- (Recombinante 4)	T1	R	0
prosGal4,mcm5- (Recombinante 4)	T1	L	0
prosGal4,mcm5- (Recombinante 4)	T2	R	0
prosGal4,mcm5- (Recombinante 4)	T2	L	0
prosGal4,mcm5- (Recombinante 4)	T3	R	1
prosGal4,mcm5- (Recombinante 4)	T3	L	0
prosGal4,mcm5- (Recombinante 4)	T1	R	0
prosGal4,mcm5- (Recombinante 4)	T1	L	0
prosGal4,mcm5- (Recombinante 4)	T2	R	0
prosGal4,mcm5- (Recombinante 4)	T2	L	0
prosGal4,mcm5- (Recombinante 4)	T3	R	0
prosGal4,mcm5- (Recombinante 4)	T3	L	1
U-gbb;mcm5-	T1	R	0
U-gbb;mcm5-	T1	L	0
U-gbb;mcm5-	T2	R	0
U-gbb;mcm5-	T2	L	0
U-gbb;mcm5-	T3	R	0
U-gbb;mcm5-	T3	L	0
U-gbb;mcm5-	T1	R	0
U-gbb;mcm5-	T1	L	0
U-gbb;mcm5-	T2	R	1
U-gbb;mcm5-	T2	L	0
U-gbb;mcm5-	T3	R	0
U-gbb;mcm5-	T3	L	1
U-tkvA,U-saxA;mcm5-	T1	R	0
U-tkvA,U-saxA;mcm5-	T1	L	0
U-tkvA,U-saxA;mcm5-	T2	R	0
U-tkvA,U-saxA;mcm5-	T2	L	0
U-tkvA,U-saxA;mcm5-	T3	R	1
U-tkvA,U-saxA;mcm5-	T3	L	1
prosGal4>U-gbb;mcm5-	T1	R	0
prosGal4>U-gbb;mcm5-	T1	L	0
prosGal4>U-gbb;mcm5-	T2	R	0
prosGal4>U-gbb;mcm5-	T2	L	0
prosGal4>U-gbb;mcm5-	T3	R	0
prosGal4>U-gbb;mcm5-	T3	L	1
prosGal4>U-gbb;mcm5-	T1	R	0
prosGal4>U-gbb;mcm5-	T1	L	0
prosGal4>U-gbb;mcm5-	T2	R	0
prosGal4>U-gbb;mcm5-	T2	L	0
prosGal4>U-gbb;mcm5-	T3	R	0
prosGal4>U-gbb;mcm5-	T3	L	1
prosGal4>U-gbb;mcm5-	T1	R	0
prosGal4>U-gbb;mcm5-	T1	L	0
prosGal4>U-gbb;mcm5-	T2	R	0
prosGal4>U-gbb;mcm5-	T2	L	1
prosGal4>U-gbb;mcm5-	T3	R	0
prosGal4>U-gbb;mcm5-	T3	L	0
prosGal4>U-gbb;mcm5-	T1	R	0
prosGal4>U-gbb;mcm5-	T1	L	0
prosGal4>U-gbb;mcm5-	T2	R	0
prosGal4>U-gbb;mcm5-	T2	L	0
prosGal4>U-gbb;mcm5-	T3	R	0
prosGal4>U-gbb;mcm5-	T3	L	0
prosGal4>U-gbb;mcm5-	T1	R	0
prosGal4>U-gbb;mcm5-	T1	L	0
prosGal4>U-gbb;mcm5-	T2	R	1
prosGal4>U-gbb;mcm5-	T2	L	0
prosGal4>U-gbb;mcm5-	T3	R	0
prosGal4>U-gbb;mcm5-	T3	L	0
prosGal4>U-tkvA,U-saxA;mcm5-	T1	R	0
prosGal4>U-tkvA,U-saxA;mcm5-	T1	L	0
prosGal4>U-tkvA,U-saxA;mcm5-	T2	R	0
prosGal4>U-tkvA,U-saxA;mcm5-	T2	L	1
prosGal4>U-tkvA,U-saxA;mcm5-	T3	R	2
prosGal4>U-tkvA,U-saxA;mcm5-	T3	L	2
prosGal4>U-tkvA,U-saxA;mcm5-	T1	R	0
prosGal4>U-tkvA,U-saxA;mcm5-	T1	L	0
prosGal4>U-tkvA,U-saxA;mcm5-	T2	R	0
prosGal4>U-tkvA,U-saxA;mcm5-	T2	L	2
prosGal4>U-tkvA,U-saxA;mcm5-	T3	R	1
prosGal4>U-tkvA,U-saxA;mcm5-	T3	L	2
prosGal4>U-tkvA,U-saxA;mcm5-	T1	R	0
prosGal4>U-tkvA,U-saxA;mcm5-	T1	L	0
prosGal4>U-tkvA,U-saxA;mcm5-	T2	R	0
prosGal4>U-tkvA,U-saxA;mcm5-	T2	L	2
prosGal4>U-tkvA,U-saxA;mcm5-	T3	R	2
prosGal4>U-tkvA,U-saxA;mcm5-	T3	L	2
prosGal4>U-tkvA,U-saxA;mcm5-	T1	R	0
prosGal4>U-tkvA,U-saxA;mcm5-	T1	L	0
prosGal4>U-tkvA,U-saxA;mcm5-	T2	R	0
prosGal4>U-tkvA,U-saxA;mcm5-	T2	L	2
prosGal4>U-tkvA,U-saxA;mcm5-	T3	R	3
prosGal4>U-tkvA,U-saxA;mcm5-	T3	L	1
prosGal4>U-tkvA,U-saxA;mcm5-	T1	R	0
prosGal4>U-tkvA,U-saxA;mcm5-	T1	L	0
prosGal4>U-tkvA,U-saxA;mcm5-	T2	R	1
prosGal4>U-tkvA,U-saxA;mcm5-	T2	L	2
prosGal4>U-tkvA,U-saxA;mcm5-	T3	R	1
prosGal4>U-tkvA,U-saxA;mcm5-	T3	L	2
prosGal4>U-tkvA,U-saxA;mcm5-	T1	R	0
prosGal4>U-tkvA,U-saxA;mcm5-	T1	L	0
prosGal4>U-tkvA,U-saxA;mcm5-	T2	R	0
prosGal4>U-tkvA,U-saxA;mcm5-	T2	L	0
prosGal4>U-tkvA,U-saxA;mcm5-	T3	R	1
prosGal4>U-tkvA,U-saxA;mcm5-	T3	L	2
prosGal4>U-tkvA,U-saxA;mcm5-	T1	R	0
prosGal4>U-tkvA,U-saxA;mcm5-	T1	L	0
prosGal4>U-tkvA,U-saxA;mcm5-	T2	R	1
prosGal4>U-tkvA,U-saxA;mcm5-	T2	L	0
prosGal4>U-tkvA,U-saxA;mcm5-	T3	R	1
prosGal4>U-tkvA,U-saxA;mcm5-	T3	L	2
U-gbb;mcm5-	T1	R	0
U-gbb;mcm5-	T1	L	0
U-gbb;mcm5-	T2	R	0
U-gbb;mcm5-	T2	L	0
U-gbb;mcm5-	T3	R	0
U-gbb;mcm5-	T3	L	0
prosGal4>U-tkvA,U-saxA;mcm5-	T1	R	0
prosGal4>U-tkvA,U-saxA;mcm5-	T1	L	0
prosGal4>U-tkvA,U-saxA;mcm5-	T2	R	1
prosGal4>U-tkvA,U-saxA;mcm5-	T2	L	0
prosGal4>U-tkvA,U-saxA;mcm5-	T3	R	1
prosGal4>U-tkvA,U-saxA;mcm5-	T3	L	2
prosGal4>U-tkvA,U-saxA;mcm5-	T1	R	0
prosGal4>U-tkvA,U-saxA;mcm5-	T1	L	0
prosGal4>U-tkvA,U-saxA;mcm5-	T2	R	1
prosGal4>U-tkvA,U-saxA;mcm5-	T2	L	2
prosGal4>U-tkvA,U-saxA;mcm5-	T3	R	2
prosGal4>U-tkvA,U-saxA;mcm5-	T3	L	1
prosGal4>U-tkvA,U-saxA;mcm5-	T1	R	0
prosGal4>U-tkvA,U-saxA;mcm5-	T1	L	0
prosGal4>U-tkvA,U-saxA;mcm5-	T2	R	1
prosGal4>U-tkvA,U-saxA;mcm5-	T2	L	0
prosGal4>U-tkvA,U-saxA;mcm5-	T3	R	2
prosGal4>U-tkvA,U-saxA;mcm5-	T3	L	1
prosGal4,mcm5- (Recombinante 4)	T1	R	0
prosGal4,mcm5- (Recombinante 4)	T1	L	0
prosGal4,mcm5- (Recombinante 4)	T2	R	0
prosGal4,mcm5- (Recombinante 4)	T2	L	0
prosGal4,mcm5- (Recombinante 4)	T3	R	0
prosGal4,mcm5- (Recombinante 4)	T3	L	0
prosGal4,mcm5- (Recombinante 4)	T1	R	0
prosGal4,mcm5- (Recombinante 4)	T1	L	0
prosGal4,mcm5- (Recombinante 4)	T2	R	1
prosGal4,mcm5- (Recombinante 4)	T2	L	0
prosGal4,mcm5- (Recombinante 4)	T3	R	0
prosGal4,mcm5- (Recombinante 4)	T3	L	1
w118	T1	R	1
w118	T1	L	1
w118	T2	R	1
w118	T2	L	1
w118	T3	R	1
w118	T3	L	1
w118	T1	R	1
w118	T1	L	0
w118	T2	R	1
w118	T2	L	1
w118	T3	R	1
w118	T3	L	1
prosGal4>U-tkv,U-sax;mcm5-	T1	R	1
prosGal4>U-tkv,U-sax;mcm5-	T1	L	0
prosGal4>U-tkv,U-sax;mcm5-	T2	R	1
prosGal4>U-tkv,U-sax;mcm5-	T2	L	1
prosGal4>U-tkv,U-sax;mcm5-	T3	R	1
prosGal4>U-tkv,U-sax;mcm5-	T3	L	1
prosGal4>U-tkv,U-sax;mcm5-	T1	R	1
prosGal4>U-tkv,U-sax;mcm5-	T1	L	2
prosGal4>U-tkv,U-sax;mcm5-	T2	R	2
prosGal4>U-tkv,U-sax;mcm5-	T2	L	2
prosGal4>U-tkv,U-sax;mcm5-	T3	R	0
prosGal4>U-tkv,U-sax;mcm5-	T3	L	0
prosGal4>U-tkv,U-sax;mcm5-	T1	R	0
prosGal4>U-tkv,U-sax;mcm5-	T1	L	1
prosGal4>U-tkv,U-sax;mcm5-	T2	R	0
prosGal4>U-tkv,U-sax;mcm5-	T2	L	1
prosGal4>U-tkv,U-sax;mcm5-	T3	R	1
prosGal4>U-tkv,U-sax;mcm5-	T3	L	1
prosGal4>U-tkv,U-sax;mcm5-	T1	R	0
prosGal4>U-tkv,U-sax;mcm5-	T1	L	0
prosGal4>U-tkv,U-sax;mcm5-	T2	R	1
prosGal4>U-tkv,U-sax;mcm5-	T2	L	2
prosGal4>U-tkv,U-sax;mcm5-	T3	R	1
prosGal4>U-tkv,U-sax;mcm5-	T3	L	1
prosGal4>U-tkv,U-sax;mcm5-	T1	R	0
prosGal4>U-tkv,U-sax;mcm5-	T1	L	0
prosGal4>U-tkv,U-sax;mcm5-	T2	R	0
prosGal4>U-tkv,U-sax;mcm5-	T2	L	0
prosGal4>U-tkv,U-sax;mcm5-	T3	R	0
prosGal4>U-tkv,U-sax;mcm5-	T3	L	0

## Sheet: Fig S1J
Fig S1J
proFMRFa positive cells
Control	Mcm2	Mcm3	Mcm4	Mcm5	Mcm6	Mcm7
6	6	2	1	0	6	0
6		3	1	0	6	0
5		1	0	0	4	0
6		6	1
		4
		3
		2
		3

## Sheet: Fig S2G
Fig S2G
Eya positive cells
Genotype	Segment	Hemisegment	Eya+
Control	T1	R	5
Control	T1	L	5
Control	T2	R	4
Control	T2	L	4
Control	T3	R	4
Control	T3	L	4
Control	T1	R	5
Control	T1	L	5
Control	T2	R	4
Control	T2	L	4
Control	T3	R	4
Control	T3	L	4
Control	T1	R	3
Control	T1	L	4
Control	T2	R	4
Control	T2	L	4
Control	T3	R	4
Control	T3	L	4
Control	T1	R	5
Control	T1	L	5
Control	T2	R	4
Control	T2	L	5
Control	T3	R	4
Control	T3	L	3
Mcm5	T1	R	4
Mcm5	T1	L	3
Mcm5	T2	R	4
Mcm5	T2	L	3
Mcm5	T3	R	4
Mcm5	T3	L	3
Mcm5	T1	R	5
Mcm5	T1	L	5
Mcm5	T2	R	2
Mcm5	T2	L	4
Mcm5	T3	R	3
Mcm5	T3	L	3
Mcm5	T1	R	3
Mcm5	T1	L	3
Mcm5	T2	R	4
Mcm5	T3	R	3
Mcm5	T3	L	4

## Sheet: Fig S3C
Fig S3C
Cas cells St16
Genotype	Segment	Hemisegment	Cas+ cells
Control	T1	L	2
Control	T2	L	2
Control	T3	L	2
Control	T1	R	3
Control	T2	R	3
Control	T3	R	3
Control	T1	L	3
Control	T2	L	2
Control	T3	L	2
Control	T1	R	2
Control	T2	R	2
Control	T3	R	2
Control	T1	L	3
Control	T2	L	3
Control	T3	L	2
Control	T1	R	2
Control	T2	R	3
Control	T3	R	2
Mcm5	T1	L	-
Mcm5	T2	L	3
Mcm5	T3	L	2
Mcm5	T1	R	-
Mcm5	T2	R	2
Mcm5	T3	R	3
Mcm5	T1	L	1
Mcm5	T2	L	2
Mcm5	T3	L	3
Mcm5	T1	R	2
Mcm5	T2	R	3
Mcm5	T3	R	3
Mcm5	T1	L	2
Mcm5	T2	L	3
Mcm5	T3	L	3
Mcm5	T1	R	2
Mcm5	T2	R	2
Mcm5	T3	R	3
